1

**Full submission**

2 **Spinal astrocyte-neuron lactate shuttle contributes to the PACAP/PAC1**

3 **receptor-induced nociceptive behaviors**

4

5 **Yuki Kambe<sup>1</sup>, Masafumi Yokai<sup>1</sup>, Ichiro Takasaki<sup>2</sup>, Takashi Kurihara<sup>1\*</sup>, Atsuro**

6 **Miyata<sup>1</sup>**

7

8 <sup>1</sup>Department of Pharmacology, Graduate School of Medical and Dental Sciences,

9 Kagoshima University, Kagoshima 890-8544, Japan

10 <sup>2</sup>Department of Pharmacology, Graduate School of Science and Engineering, University

11 of Toyama, Toyama 930-8555, Japan

12

13 Address correspondence to: Takashi Kurihara

14 Department of Pharmacology, Graduate School of Medical and Dental Sciences,

15 Kagoshima University

16 Sakuragaoka 8-35-1, Kagoshima 890-8544, Japan

17 Tel.: +81-99-275-5256

18 Fax: +81-99-265-8567

19 E-mail: tkmphm10@m.kufm.kagoshima-u.ac.jp

20

21 Keywords: pain, pituitary adenylate cyclase-activating polypeptide, astrocyte-neuron

22 lactate shuttle, protein kinase C, monocarboxylate transporter, glycogenolysis

23

24 Abbreviations used: artificial cerebrospinal fluid (ACSF), adenylate cyclase (AC),

25 astrocyte-neuron lactate shuttle (ANLS), central nervous system (CNS), glial fibrillary

26 acidic protein (GFAP), intrathecal (i.t.), maxadilan (Max), monocarboxylate transporter

27 (MCT), pituitary adenylate cyclase-activating polypeptide (PACAP), protein kinase A

28 (PKA), protein kinase C (PKC), phorbol 12-myristate 13-acetate (PMA), glycogen

29 phosphorylase (PYGB), vasoactive intestinal polypeptide (VIP)

30

31 **Abstract** Previously, we showed that spinal pituitary adenylate cyclase-activating  
32 polypeptide (PACAP)/PAC1 receptor signaling triggers long-lasting pain behaviors  
33 through astroglial activation. Since astrocyte-neuron lactate shuttle (ANLS) could be  
34 essential for long-term synaptic facilitation, we aimed to elucidate a possible  
35 involvement of spinal ANLS in the development of the PACAP/PAC1 receptor-induced  
36 pain behaviors. A single intrathecal administration of PACAP induced short-term  
37 spontaneous aversive behaviors, followed by long-lasting mechanical allodynia. These  
38 pain behaviors were inhibited by DAB, an inhibitor of glycogenolysis, and this  
39 inhibition was reversed by simultaneous L-lactate application. In the cultured spinal  
40 astrocytes, the PACAP-evoked glycogenolysis and lactate secretion were inhibited by a  
41 protein kinase C (PKC) inhibitor, and the PKC inhibitor attenuated the PACAP-induced  
42 pain behaviors. Finally, an inhibitor for the monocarboxylate transporters blocked the  
43 lactate secretion from the spinal astrocytes and inhibited the PACAP-induced pain  
44 behaviors. These results suggested that PAC1 receptor-PKC-ANLS signaling is  
45 involved in the PACAP-induced pain behaviors.

46

47 **Introduction**

48 Transfer of lactate from astrocytes to neurons is activated when synaptic activity is  
49 increased, and this mechanism is now known as the astrocyte-neuron lactate shuttle  
50 (ANLS), that could account for the coupling between synaptic activity and energy  
51 delivery (*Magistretti and Allaman, 2015*). Since lactate secretion from astrocytes is  
52 mainly originated from glycogen via glycogenolysis rather than from glycolysis  
53 (*Dringen et al., 1993*), inhibition of glycogenolysis or lactate transport in rat  
54 hippocampus significantly attenuated the working memory and long-term fear memory  
55 (*Newman et al., 2011; Suzuki et al., 2011*). In addition, a brain-specific glycogen  
56 synthase knockout mouse showed a significant deficiency in the acquisition with an  
57 associative learning task and concomitantly, activity-dependent changes in hippocampal  
58 synaptic strength (*Duran et al., 2013*). It is also reported that ANLS in amygdala is  
59 critical for the reconsolidation of cocaine memory in rats (*Boury-Jamot et al., 2015;*  
60 *Zhang et al., 2015*). At the cellular level, lactate may potentiate NMDA  
61 receptor-mediated currents in cultured neurons and neurons in the nucleus of the solitary  
62 tract (*Nagase et al., 2014; Yang et al., 2014*). These findings suggested that ANLS  
63 could contribute to many forms of neuronal plasticity in the CNS, including plastic  
64 changes in the spinal nociceptive transmission. However, it is still unclear what kinds of

65 neurotransmitters evoke the ANLS activation during any forms of neuronal plasticity.

66

67 Pituitary adenylate cyclase-activating polypeptide (PACAP) was originally isolated  
68 from ovine hypothalamic extracts based on its ability to stimulate adenylate cyclase in  
69 rat anterior pituitary cell cultures (*Miyata et al., 1989; Miyata et al., 1990*). In normal  
70 state, PACAP specific receptor, PAC1 receptor, is particularly abundant in central  
71 nervous system (CNS) including spinal dorsal horn (*Dickinson et al., 1999; Jongsma et*  
72 *al., 2000; Sakashita et al., 2001; Vaudry et al., 2009; Yokai et al., 2016*), where  
73 PACAP-immunoreactive fibers are also considerably localized (*Moller et al., 1993;*  
74 *Dun et al., 1996a; Dun et al., 1996b; Narita et al., 1996*), and PACAP  
75 mRNA/immunoreactivity in rat dorsal root ganglia is markedly upregulated in  
76 peripheral nerve injury or inflammation (*Zhang et al., 1995; Zhang et al., 1998;*  
77 *Jongsma et al., 2003; Mabuchi et al., 2004*). These observations coupled with other  
78 lines of evidence propose that PACAP/PAC1 receptor system could play an important  
79 role in the modulation of spinal nociceptive transmission.

80

81 We have previously demonstrated in mice that a single intrathecal (i.t.) injection of  
82 PACAP or a PAC1 receptor specific agonist, maxadilan (Max) (*Moro and Lerner, 1997*),

83 induced spontaneous aversive behaviors, such as licking, biting, and scratching directed  
84 toward the caudal part of the body for more than 30 min (*Shimizu et al., 2004; Ohnou*  
85 *et al., 2016*), and the aversive behaviors were followed by a induction of the mechanical  
86 allodynia, which lasted for more than 84 days (*Yokai et al., 2016*). However, vasoactive  
87 intestinal polypeptide (VIP), which share VIP/PACAP (VPAC) 1 or VPAC2 receptors  
88 with PACAP, failed to induce these nociceptive behaviors (*Ohnou et al., 2016; Yokai et*  
89 *al., 2016*). Co-treatment of a PAC1 receptor antagonist, max.d.4 with PACAP, almost  
90 completely inhibited the induction of both aversive behaviors and the mechanical  
91 allodynia (*Ohnou et al., 2016; Yokai et al., 2016*). These results suggested critical role  
92 of PAC1 receptor in nociceptive transmission. Immunohistochemical and  
93 immunoblotting studies revealed that spinal application of PACAP or Max induced  
94 upregulation of an astrocyte marker, glial fibrillary acidic protein (GFAP) at least for 84  
95 days, and L- $\alpha$ -aminoadipate, an astroglial toxin, attenuated the induction of both  
96 aversive behaviors and mechanical allodynia. Interestingly, L- $\alpha$ -aminoadipate were still  
97 effective to reverse the mechanical allodynia even if it was i.t.- administered 84 days  
98 after spinal PAC1 receptor stimulation (*Yokai et al., 2016*). These results suggest that  
99 long-lasting spinal astocytic activation underlies the PACAP/PAC1 receptor-induced  
100 aversive behaviors and mechanical allodynia. However, how spinal astrocytes

101 contribute to these nociceptive behaviors is still unknown.

102

103 Glycogen is the single largest energy reserve in the brain, and is predominantly  
104 localized in astrocytes (*Cataldo and Broadwell, 1986*). Among the neurotransmitters  
105 and bioactive substances examined up until today, PACAP is suggested to have potent  
106 glycogenolytic activity with an EC<sub>50</sub> value of 0.08 nM (*Magistretti et al., 1998*). To the  
107 best of our knowledge, PACAP has the highest efficacy to induce glycogenolysis.  
108 However, it is not known whether PACAP is involved in the spinal ANLS. Therefore,  
109 we aimed to examine possible involvement of PACAP/PAC1 receptor system in the  
110 spinal ANLS, and also test whether the spinal ANLS contributes to the PACAP/PAC1  
111 receptor-induced nociceptive behaviors.

112

## 113 **Results**

### 114 **PACAP/PAC1 receptor-induced nociceptive behaviors were attenuated by the** 115 **inhibition of glycogen phosphorylase with DAB**

116 We first examined whether spinal ANLS played important role in the PACAP/PAC1  
117 receptor-induced nociceptive behaviors in mice. After a single i.t. administration of Max  
118 (50 pmol) or PACAP (100 pmol), aversive behaviors such as licking and biting

119 gradually appeared within 0 ~ 5 min, reached to the plateau around 15 ~ 20 min, and  
120 maintained at least for 30 min. The co-injection of DAB, a glycogen phosphorylase  
121 (PYGB) inhibitor, dose-dependently (1 ~ 100 pmol) attenuated the development of the  
122 Max- or PACAP- induced aversive behaviors (*Figure 1A, C*). In addition, a single i.t.  
123 administration of Max or PACAP markedly decreased mechanical threshold (induction  
124 of mechanical allodynia) from day 1 (after the cessation of the aversive behaviors), and  
125 this decrease persisted at least for 21 days after the administration. The co-injection of  
126 DAB with Max or PACAP also dose-dependently attenuated the induction of  
127 mechanical allodynia by Max or PACAP (*Figure 1B, D*).

128

129 **Suppression of the PAC1 receptor-evoked nociceptive behaviors by DAB was**  
130 **reversed by i.t. co-injection of L-lactate**

131 Because lactate secretion from astrocytes was mainly derived from glycogen store  
132 (*Dringen et al., 1993*), we then asked whether the inhibition of the PAC1  
133 receptor-induced nociceptive behaviors by DAB could be reversed by the  
134 co-administration of exogenous L-lactate. I.t. injection of L-lactate (1 nmol) in  
135 combination with Max (50 pmol) + DAB (10 pmol) significantly reversed the  
136 anti-aversive and anti-allodynic effects of DAB on the PAC1 receptor-induced



137 nociceptive behaviors (*Figure 2A, B*). Similarly, i.t. supplementation of L-lactate (1  
138 nmol) also blocked the inhibitory effects of DAB (100 pmol) on the PACAP-induced  
139 aversive behaviors and mechanical allodynia (*Figure 2C, D*). These results suggested  
140 that spinal ANLS has critical role in the PACAP/PAC1 receptor-induced nociceptive  
141 behaviors. However, L-lactate (10 nmol) alone did not show any pain related behaviors  
142 (data not shown).

143

144 **Possible involvement of PKC in the PACAP/PAC1 receptor-evoked glycogenolysis**  
145 **in cultured spinal cord astrocytes**

146 We prepared cultured astrocytes from newborn mice spinal cords, and confirmed that  
147 most cells were suggested to be astrocytes, < 1% cells were oligodendrocytes, and no  
148 neurons or microglial cells were detected, when visualized with immunocytochemistry  
149 for specific markers of individual cells (*Figure 3 - figure supplement 1*). In order to  
150 identify the receptor subtypes involved in the PACAP-evoked glycogenolysis in the  
151 spinal astrocytes, we exposed PACAP, VIP or Max and determined glycogen amount in  
152 the cells. Exposure of PACAP (0.0001 ~ 10 nM) or Max (0.1 ~ 10 nM)  
153 dose-dependently decreased glycogen amount (*Figure 3A, B*), but VIP failed to  
154 decrease the glycogen amount even at the concentration of 10 nM (*Figure 3C*),

155 suggesting that PAC1 receptor is primarily involved in the glycogenolysis. Interestingly,  
156 this pharmacological characteristic of glycogenolysis was very similar to that of the  
157 PACAP-induced nociceptive behaviors in mice reported previously (*Ohnou et al.,*  
158 *2016; Yokai et al., 2016*). This PACAP-induced glycogenolysis was completely  
159 abolished by the DAB (1 mM) (*Figure 3D*), indicating that the glycogenolysis by  
160 PACAP would be mediated by PYGB. Since PAC1 receptor can couple with both G<sub>s</sub>  
161 and G<sub>q</sub> proteins, leading to the activation of the protein kinase A (PKA) and protein  
162 kinase C (PKC), respectively (*Deutsch and Sun, 1992*), we co-applied GF109203X as a  
163 PKC inhibitor, H89 or Rp-8-Br-cAMPS as a PKA inhibitor, or Sq22.536 as an adenylate  
164 cyclase (AC) inhibitor with PACAP. We found that GF109203X (5 μM) significantly  
165 inhibited the PACAP-evoked glycogenolysis (*Figure 3E*), but neither the PKA  
166 inhibitors (*Figure 3F*), nor the AC inhibitor (*Figure 3 - figure supplement 2A*) affected  
167 the glycogenolysis. Although these results may contradict previous reports that  
168 cAMP/PKA signaling pathway stimulated glycogenolysis in chick brain or cultured  
169 mouse cortical astrocytes (*Sorg and Magistretti, 1991; Gibbs, 2016*), forskolin, an AC  
170 activator, significantly stimulated glycogenolysis in cultured spinal astrocytes (*Figure 3*  
171 *– figure supplement 2B*). These results suggested that PAC1 receptor might not be  
172 coupled with the G<sub>s</sub> protein/PKA pathway, and support the significance of the G<sub>q</sub>

173 protein/PKC pathway for the PACAP/PAC1 receptor-induced glycogenolysis in our  
174 cultured spinal cord astrocytes.

175

176 **PKC is crucial for the PACAP/PAC1 receptor-evoked lactate secretion in the**  
177 **cultured spinal astrocytes**

178 To investigate whether lactate secretion from astrocytes is increased by the  
179 PACAP/PAC1 receptor/PKC pathway, we measured the lactate amounts in the  
180 supernatants from the cultured spinal astrocytes after drug treatment. PACAP (1 nM)  
181 significantly increased lactate amounts in the supernatant in both 0 ~ 60 min (early  
182 phase) and 60 ~ 120 min (late phase) after the exposure (*Figure 4A, B*). PMA (100 nM),  
183 a PKC activator, significantly elevated lactate secretion in the late phase (*Figure 4C, D*),  
184 while forskolin (5  $\mu$ M) failed to enhance lactate secretion (*Figure 4E, F*). In addition,  
185 GF109203X (5  $\mu$ M) significantly inhibited the PACAP-activated lactate secretion in  
186 both phases (*Figure 4G, H*), suggesting the importance of PKC, but not PKA, in the  
187 PACAP-activated lactate secretion. Furthermore, the inhibition of glycogenolysis by  
188 DAB significantly decreased the lactate amount in the supernatant from the astrocytes  
189 particularly in the late phase (*Figure 4I, J*), indicating that glycogenolysis is also  
190 inevitable for the lactate secretion. These results pointed out that PACAP/PAC1

191 receptor/PKC pathway is a key signaling mechanism for the spinal ANLS activation.

192

193 **Blockade of the PACAP/PAC1 receptor-induced nociceptive behaviors by the PKC**  
194 **inhibitor, GF109203X**

195 In order to investigate whether PACAP/PAC1 receptor-induced nociceptive behaviors  
196 were also mediated through PKC pathway, effects of GF109203X was investigated.

197 Both the aversive behaviors and the mechanical allodynia evoked by PACAP were  
198 dose-dependently inhibited by the simultaneous injection of GF109203X at a  
199 concentration range from 1 to 100 pmol (*Figure 5A, B*), suggesting the importance of  
200 PKC activity in the PACAP/PAC1 receptor-induced nociceptive behaviors.

201

202 **Pharmacological inhibition of monocarboxylate transporters attenuated the**  
203 **PACAP/PAC1 receptor-induced nociceptive behaviors**

204 Finally, we asked whether lactate transport participated in the PACAP/PAC1 receptor-  
205 induced nociceptive behaviors. L-lactate is one of the substrates of monocarboxylate  
206 transporters (MCTs), and MCTs are found in the brain where three isoforms — MCT1,  
207 MCT2 and MCT4 — have been described. Although the distribution patterns of these  
208 MCTs are not well-known in the spinal cord, each of these isoforms is suggested to

209 exhibit a distinct regional and cellular distribution in rodent brain. At the cellular level,  
210 MCT1 is known to be expressed by endothelial cells of microvessels, by  
211 ependymocytes as well as by astrocytes. MCT4 expression appears to be specific for  
212 astrocytes. By contrast, the predominant neuronal MCT is suggested to be MCT2  
213 (*Pierre and Pellerin, 2005*). It is reported that AR-C155858 potently inhibits MCT1 and  
214 MCT2, but not MCT4 (*Ovens et al., 2010*). In our cultured spinal astrocytes,  
215 AR-C155858 (1  $\mu$ M) significantly inhibited lactate secretion evoked by PACAP at both  
216 phases (*Figure 6A, B*). Simultaneous i.t. injection of AR-C155858 (1 nmol) with  
217 PACAP significantly inhibited the development of the aversive behaviors (*Figure 6C*).  
218 Intriguingly, i.t. administration of AR-C155858 transiently alleviated the mechanical  
219 allodynia at 7 days after i.t. injection of PACAP (*Figure 6D*), suggesting that spinal  
220 ANLS activation evoked by a single i.t. injection of PACAP may persist at least for 7  
221 days.

222

## 223 **Discussion**

224 In this study, we have further characterized the nociceptive behaviors induced by the  
225 spinal PAC1 receptor activation and made the following findings: 1) PACAP could be  
226 an endogenous inducer for spinal ANLS activation; 2) spinal ANLS activation by

227 PACAP/PAC1 receptor signaling contributed to nociceptive behaviors such as aversive  
228 behaviors and mechanical allodynia; 3) PKC activation (possibly in the spinal  
229 astrocytes) played an important role in the PACAP/PAC1 receptor-evoked spinal ANLS;  
230 and 4) spinal ANLS activity underling the generation of the nociceptive behaviors  
231 persisted at least for 7 days after the PAC1 receptor activation by a single i.t. injection  
232 of PACAP.

233

234 **PACAP/PAC1 receptor-evoked ANLS activation is crucial for the nociceptive**  
235 **behaviors**

236 In the present study, we showed that the simultaneous i.t. injection of DAB, the inhibitor  
237 of glycogenolysis, blocked the development of aversive behaviors and mechanical  
238 allodynia evoked by Max or PACAP, and this inhibition by DAB was reversed by the  
239 combinational injection of L-lactate. These results suggested that the ANLS activation  
240 may have significant role in the nociceptive behaviors by PACAP/PAC1 receptor  
241 activation.

242

243 Chronic pain may need maladaptive synaptic plasticity in neural circuits (*Sandkuhler,*  
244 *2007; Kuner and Flor, 2016*). An in vivo electrophysiological study showed that DAB

245 inhibited the long-term potentiation by tetanus stimulus in hippocampal Schaffer  
246 collateral-area CA1, and this impairment by DAB was rescued with the exogenous  
247 L-lactate (*Suzuki et al., 2011*). Furthermore, L-lactate alone was shown to potentiate  
248 AMPA receptor- or NMDA receptor-mediated inward currents, increase intracellular  
249 calcium, and also upregulate the markers for neuronal activation (*Suzuki et al., 2011*;  
250 *Nagase et al., 2014*; *Yang et al., 2014*). Thus, PACAP/PAC1 receptor-evoked spinal  
251 ANLS might potentiate AMPA/NMDA receptors-mediated responses and induce  
252 long-term potentiation, which might lead to aversive behaviors and long-lasting  
253 mechanical allodynia.

254

255 Regarding the initiation and maintenance of inflammatory and neuropathic pain,  
256 recent progresses also focus on the critical role of astrocytes in the spinal cord and brain  
257 (*Ji et al., 2014*; *Grace et al., 2014*). Previously, we showed that i.t. injection of Max or  
258 PACAP induced rapid and prolonged upregulation of spinal GFAP expression level in  
259 parallel with the aversive behaviors and long-lasting mechanical allodynia, and  
260 simultaneous application of L- $\alpha$ -amino adipate, an astrocyte toxin, with Max or PACAP  
261 markedly suppressed the aversive behaviors and the mechanical allodynia (*Ohnou et al.,*  
262 *2016*; *Yokai et al., 2016*). Interestingly, it is suggested that glycogen metabolism is

263 associated with maturation of astrocytes, in which the expressional levels of GFAP and  
264 glycogen synthase or phosphorylase are increased in parallel (*Brunet et al., 2010*). In  
265 accordance with this notion, our present study revealed that ANLS activation indeed  
266 contributed to both development and maintenance of PACAP/PAC1 receptor-evoked  
267 nociceptive behaviors, since i.t. injection of AR-C155858 could prevent the  
268 development of the PACAP-induced aversive behaviors and ameliorate the mechanical  
269 allodynia 7 days after PACAP injection. Although, further study is needed to clarify the  
270 persistency of ANLS activation and its role in the long-lasting mechanical allodynia,  
271 these results suggested the therapeutic potential of the ANLS inhibitors for chronic pain  
272 treatments.

273

274 **PACAP/PAC1 receptor/PKC signaling pathway played an important role in spinal**  
275 **glycogenolysis**

276 Glycogen contained in cultured spinal cord astrocytes was significantly decreased by  
277 the Max or PACAP, but not VIP, exposure. These results suggested that PAC1 receptor,  
278 but not VPAC1 nor VPAC2 receptor, was responsible for activating glycogenolysis. In  
279 rat atrial myocytes, a PKC inhibitor peptide reduced the PACAP-induced  $K_{ATP}$  currents  
280 without affecting the VIP-induced  $K_{ATP}$  currents (*Baron et al., 2001*), indicating



281 selective coupling of PKC with PAC1 receptor. Indeed, in our present study,  
282 PACAP-evoked glycogenolysis was significantly inhibited by the PKC inhibitor,  
283 GF109203X, but not by the PKA inhibitors. These results suggested that PAC1  
284 receptor/PKC signaling pathway is important for the glycogenolysis activation.

285

286 Previous reports which observed glycogenolysis in chick brain or cultured mouse  
287 cortical astrocytes suggested that cAMP/PKA signaling pathway phosphorylated  
288 glycogen phosphorylase and evoked glycogenolysis (*Sorg and Magistretti, 1991; Gibbs,*  
289 *2016*). But in our cultured spinal astrocytes, both PKA inhibitors and AC inhibitor failed  
290 to prevent the PACAP-evoked glycogenolysis. Although the reason why  
291 PACAP-evoked glycogenolysis is not sensitive to the PKA inhibitors is currently  
292 unknown, this may be due to the absence of the coupling of PACAP/PAC1 receptor to  
293 G<sub>s</sub> protein in the spinal astrocytes, because both PKA and adenylate cyclase inhibitor  
294 failed to inhibit the PACAP-evoked glycogenolysis, and forskolin, a direct AC activator,  
295 successfully evoked glycogenolysis. But further study is required to verify this  
296 possibility.

297

298 It is previously suggested that VIP neurons exert their glycogenolytic action in the

299 neocortical region (*Magistretti and Allaman, 2015*), but in our cultured spinal  
300 astrocytes, VIP failed to evoke glycogenolysis at the concentration up to 10 nM. This  
301 discrepancy might be due to the regional difference, because in our unpublished results  
302 with using cultured cortical astrocytes, VIP ( $EC_{50} = 0.43$  nM) as well as PACAP ( $EC_{50} =$   
303  $0.0084$  nM) could evoke glycogenolysis. In addition, cortical astrocytes express VPAC2  
304 receptors more abundantly than PAC1 receptor (our unpublished observation). These  
305 results support the notion of the regional difference of astrocytic function, and the  
306 glycogenolysis of the spinal astrocytes might be primarily mediated by PACAP  
307 signaling, while that in the cortical astrocytes might be mediated by both PACAP and  
308 VIP signaling.

309

310 The reason why DAB treatment with PACAP increased glycogen level more than  
311 vehicle control might be due to the constitutive activity of PYGB. However, further  
312 research is also necessary to elucidate the basal activity of PYGB in the spinal  
313 astrocytes.

314

315 **PACAP/PAC1 receptor/PKC signaling-evoked glycogenolysis played a critical role**  
316 **in the lactate secretion**

317 PACAP and PMA significantly enhanced lactate secretion. In addition, GF109203X and  
318 DAB significantly inhibited the PACAP-enhanced lactate secretion. These results  
319 proposed that PKC and a downstream glycogenolysis were important in the  
320 PACAP-enhanced lactate secretion. It is previously reported that the PKC activation  
321 resulted in an increase in the levels of MCT1 and MCT4 and the release of lactate in an  
322 in vitro skeletal muscle cells (RD cells), while the PKA activation resulted in a  
323 significant decrease in MCT1 expression in the RD cells as well as endothelial cells  
324 (*Narumi et al., 2010; Narumi et al., 2012; Smith et al., 2012*). Although the PKA  
325 activation by dbcAMP (cAMP analogue) or isoproterenol (selective  $\beta$  agonist) was  
326 shown to significantly decrease glycogen level in astrocytes/neurons mixed culture, the  
327 secretion of lactate, contrary to expectation, was unchanged or decreased (*Tarczyluc et*  
328 *al., 2013*). Consistent with these reports, our preliminary observation using cultured  
329 cortical astrocytes, forskolin significantly attenuated the lactate secretion, even though  
330 significant glycogenolysis was observed (unpublished observation). These results  
331 indicate that increased lactate secretion by PKC might involve the activation of MCT1  
332 and MCT4, and in some cases, PKA might counteract PKC-induced action on lactate  
333 secretion. Since forskolin treatment did not stimulate lactate secretion in the spinal  
334 astrocytes, PACAP/PAC1 receptor/PKC signaling, but not PKA signaling, would be

335 involved in the lactate secretion in our present experimental condition.

336

337 It may be noteworthy that DAB significantly inhibited the lactate secretion in the late  
338 phase after PACAP exposure, but failed to inhibit in the early phase. Our results may be  
339 consistent with a previous report that DAB significantly attenuated the lactate secretion  
340 during 60 ~ 180 min after the hypoglycemia on the astrocytes/neurons mixed culture,  
341 while equivalent amount of lactate was secreted irrespective of the presence of DAB  
342 during 0 ~ 60 min, even DAB completely inhibited glycogenolysis at both timings  
343 (*Tarczyluk et al., 2013*). Thus, these observations may indicate that the secreted lactate  
344 in the late phase is originated from glycogenolysis, and the secretion in the early phase  
345 may be partly derived from the readily releasable pool of lactate in the spinal astrocytes.

346

347 **PACAP/PAC1 receptor-induced PKC activation is important for the nociceptive**  
348 **behaviors**

349 We found that developments of the PACAP/PAC1 receptor-induced aversive behaviors  
350 and mechanical allodynia were significantly attenuated by the PKC inhibition with  
351 GF109203X. Although many lines of evidence strongly suggested the significance of  
352 PKC in inflammatory or neuropathic pain (*Vel'azquez et al., 2007*), it is still unknown

353 what kinds of PKC isozymes actually contribute to the PACAP/PAC1 receptor-evoked  
354 ANLS activation, or in which cell types the PKC was activated. PKC has several  
355 isozymes and, western blotting showed that phospho-PKC- $\delta$ , - $\theta$  and - $\zeta$  levels were  
356 significantly increased in ipsilateral spinal cord after spinal nerve injury, but expression  
357 levels of phospho-PKC- $\alpha$  and - $\beta$  were not significantly changed (*Gosselin et al., 2013*).  
358 Further double labeling immunofluorescence showed that phospho-PKC- $\delta$  co-localized  
359 with astrocytic markers and phospho-PKC- $\theta$  and - $\zeta$  co-localized with neuronal markers  
360 in spinal cord (*Gosselin et al., 2013*). Another research group reported that the i.t.  
361 injection of a PKC- $\delta$  inhibitor significantly attenuated paclitaxel-induced mechanical  
362 allodynia in mice (*He and Wang, 2015*). These results suggested that PKC- $\delta$  might be  
363 an astrocytic PKC isoform and contribute to the pain behaviors observed in this study.  
364 Interestingly, it is indicated that PMA-induced stimulation of MCT4 expression can be  
365 mediated through a novel PKC isozyme, especially PKC- $\delta$ , and rottlerin, a selective  
366 PKC- $\delta$  inhibitor, cancelled PMA-induced MCT4 protein expression in the RD cells  
367 (*Narumi et al., 2012*). Further study is needed to elucidate the contribution of PKC  
368 isozymes in the PACAP/PAC1 receptor-induced spinal ANLS and nociceptive  
369 behaviors.  
370

371 It may be worth noting our previous data here that i.t. injection of the PKA inhibitor,  
372 Rp-8-Br-cAMPS, could ameliorate the PACAP-induced aversive behaviors (*Ohnou et*  
373 *al., 2016*). Currently it may be difficult to precisely reconcile with the present  
374 observation that the PKA inhibitor failed to prevent PACAP-evoked glycogenolysis in  
375 the spinal astrocytes, but we could speculate that neuronal PKA signaling would also  
376 contribute to the expression of the pain behaviors. However, further extensive studies  
377 are necessary to uncover the interaction of PKC and PKA signaling in the  
378 PACAP/PAC1 receptor-induced pain behaviors.

379

380 **MCTs had an important role in PACAP/PAC1 receptor-induced nociceptive**  
381 **behaviors**

382 In cultured spinal astrocytes, AR-C155858 potently inhibited PACAP-evoked lactate  
383 secretion. In the behavioral study, the simultaneous i.t. injection of AR-C155858  
384 significantly attenuated the development of the PACAP-induced aversive behaviors. In  
385 addition, AR-C155858 also transiently reversed the PACAP-induced mechanical  
386 allodynia 7 days after the PACAP injection. These observations suggested the important  
387 contribution of lactate transportation via MCTs to the induction as well as the  
388 maintenance of the nociceptive behaviors evoked by the spinal PACAP/PAC1 receptor

389 signaling. The significance of MCTs on the synaptic plasticity was previously reported.  
390 Hippocampal MCT1 expression but not MCT2 or MCT4 expression was significantly  
391 upregulated upon inhibitory avoidance training in rats, and blocking the function of  
392 MCT1, MCT2 or MCT4 by the antisense oligonucleotides impaired long-term memory  
393 (*Suzuki et al., 2011*). Moreover, in the cocaine-induced conditioned place preference  
394 test, re-exposure to a cocaine-associated context significantly increased the expression  
395 of MCT1 and MCT2, and disrupting their expression led to the impairment of  
396 reconsolidation (*Zhang et al., 2015*). At the cellular level, L-lactate-induced increased  
397 expressions of immediately early genes such as *Arc*, *c-fos* and *Zif268* were blocked in  
398 the presence of a MCT inhibitor, UK5099 (*Yang et al., 2014*). To our knowledge, the  
399 present study is the first report establishing the significance of MCTs in nociceptive  
400 behaviors.

401

402 In summary, we have shown that the interaction between spinal dorsal horn neurons  
403 and astrocytes evoked by PACAP/PAC1 receptor-induced ANLS activation is critically  
404 involved in the development and maintenance of the nociceptive behaviors. The  
405 signaling pathway linking between PAC1 receptor activation and ANLS might be at  
406 least partially mediated by PKC pathway. Although verifying the possible involvement

407 of PACAP/PAC1 receptor signaling in human pain as well as animal pain models  
408 requires further rigorous studies, targeting spinal ANLS may provide a new opportunity  
409 to treat intractable chronic pain.

410

#### 411 **Materials and methods**

#### 412 **Key resources table**

| 413 | <b>Reagent type</b> | <b>Designation</b> | <b>Source</b>          | <b>Identifiers</b> |
|-----|---------------------|--------------------|------------------------|--------------------|
| 414 | Drug                | Maxadilan          | Dr. M Tajima, Shiseido |                    |
| 415 | Drug                | DAB                | Wako                   | 040-24941          |
| 416 | Drug                | PACAP              | Peptide Institute      | 4221-v             |
| 417 | Drug                | L-lactate          | Sigma-Aldrich          | 71718              |
| 418 | Drug                | VIP                | Peptide Institute      | 4110-v             |
| 419 | Drug                | GF109203X          | Wako                   | 079-03811          |
| 420 | Drug                | H89                | Seikagaku Co.          | 120836             |
| 421 | Drug                | Rp-8-Br-cAMPS      | Sigma-Aldrich          | A165               |
| 422 | Drug                | PMA                | Wako                   | 545-00261          |
| 423 | Drug                | Forskolin          | Merck Millipore        | 344281             |
| 424 | Drug                | AR-C155858         | Merck Millipore        | 533436             |



|     |          |                   |                   |           |
|-----|----------|-------------------|-------------------|-----------|
| 425 | Drug     | Sq22.536          | Enzo Biochem Inc. | BML-CN140 |
| 426 | Antibody | mouse anti-GFAP   | Merck Millipore   | MAB360    |
| 427 | Antibody | mouse anti-MAP2   | Sigma-Aldrich     | M-4403    |
| 428 | Antibody | rabbit anti-Iba1  | Wako              | 019-19741 |
| 429 | Antibody | mouse anti-CNPase | Abcam             | ab6319    |

430

#### 431 **Animals**

432 Male ddY mice (6 ~ 12 weeks old) or pregnant female ddY mice were purchased from  
433 Kyudo Co. Ltd. (Kumamoto, Japan) and housed under controlled temperature ( $24 \pm$   
434  $1^{\circ}\text{C}$ ) and humidity ( $55 \pm 10\%$ ) with a 12-h light/dark cycle with food and water freely  
435 available.

436

#### 437 **Ethics**

438 The animal experiments were approved by the Animal Care Committee of Kagoshima  
439 University (approval no. MD15082), and were conducted in accordance with the ethical  
440 guidelines for the study of experimental pain in conscious animals of the International  
441 Association for the Study of Pain.

442

443 **Intrathecal (i.t.) injection and behavioral observation**

444 I.t. injection was given in a volume of 5  $\mu$ l by percutaneous puncture through an  
445 intervertebral space at the level of the fifth or sixth lumbar vertebra, according to a  
446 previously reported procedure (*Yokai et al., 2016*). An investigator, who was unaware of  
447 the drug treatment, performed all of the behavioral experiments.

448

449 Aversive behavior was evaluated according to our previous report (*Ohnou et al.,*  
450 *2016*). Before i.t. injection, mice were placed and habituated in a glass cylinder ( $\phi$ 14  $\times$   
451 18 cm) with a filter paper at the bottom over 20 min. Immediately after i.t. injection, the  
452 mice were placed again in the same glass cylinder and the number of pain behaviors  
453 consisting of licking, biting and scratching directed toward the caudal part of the body  
454 was counted every 1 min. The cumulative number of events was pooled over 5 min bins  
455 of observation, and analyzed.

456

457 The assessment of mechanical thresholds was also carried out according to the  
458 previously described methods (*Yokai et al., 2016*). Briefly, mechanical sensitivity was  
459 evaluated with calibrated von Frey hairs (Stoelting, Wood Dale, IL) by measuring the  
460 tactile stimulus producing a 50% likelihood of hind paw withdrawal response (50%

461 gram threshold), which was determined using the up-down paradigm (*Chaplan et al.,*  
462 *1994*).

463

464 **Drugs**

465 PACAP (38 amino acid form) and VIP were purchased from Peptide Institute Inc.  
466 (Osaka, Japan). Maxadilan was kindly donated by Dr. M Tajima (Shiseido, Japan).

467 1,4-dideoxy-1,4-imino-d-arabinitol (DAB), GF109203X and phorbol 12-myristate

468 13-acetate (PMA) were obtained from Wako Pure Chemical Industries, Ltd. (Osaka,

469 Japan). Forskolin and AR-C155858 was from Merck Millipore (Darmstadt, Germany).

470 H89 was from Seikagaku Co. (Tokyo, Japan). L-lactate and Rp-8-Br-cAMPS were from

471 Sigma-Aldrich Co. LLC (St. Louis, MO). Sq22.536 was from Enzo Biochem Inc.

472 (Farmingdale, NY). These drugs were made up as concentrated stock solution in MilliQ

473 water, 0.1 M acetic acid or dimethyl sulfoxide, aliquoted, and stored at  $-30^{\circ}\text{C}$  and

474 diluted just before use. Aliquot of drugs were diluted to the desired concentration in

475 artificial cerebrospinal fluid (ACSF: NaCl 138 mM, KCl 3 mM,  $\text{CaCl}_2$  1.25 mM,  $\text{MgCl}_2$

476 1 mM, D-glucose 1 mM) immediately prior to use. The doses for i.t. injection of

477 PACAP38 (100 pmol) and maxadilan (50 pmol) we chose in this study were determined

478 according to our previous reports (*Shimizu et al., 2004; Ohnou et al., 2016; Yokai et al.,*

479 2016).

480

#### 481 **Cultured spinal cord astrocytes**

482 Spinal cords from postnatal day 1 and 2 mice were dispersed by 0.25% trypsin and

483 subsequently plated on culture flasks which were previously coated with 0.75 ug/mL

484 poly-L-lysine (Sigma-Aldrich, St. Louis, MO). Cells were cultured in Dulbecco's

485 modified Eagle medium (Nacalai Tesque, Osaka, Japan) supplemented with 10% fetal

486 bovine serum (Hyclone, South Logan, UT) until cell density reached to confluent. After

487 reaching to confluent, culture flasks were shaken at 240 rpm for 6 hrs to remove

488 microglia or oligodendrocyte precursor cells. Remaining astrocytes on culture flasks

489 were then detached and subsequently plated on the appropriate culture dishes at the

490 density of  $1 \times 10^4$  cells/cm<sup>2</sup>, and used when the cell number reached to the confluent

491 again, which usually took 3 days. All of the cultured astrocytes used in the current

492 experiments was passaged by 3 or 4 times.

493

#### 494 **Glycogen assay**

495 Cultured spinal astrocytes were exposed to PACAP, VIP, Max or forskolin for 1 hr,

496 washed in the ice-cold phosphate buffered saline 3 times, and harvested in ice-cold

497 MilliQ water by scratching. Samples were then boiled for 10 min, sonicated, and  
498 centrifuged. Glycogen amount in the supernatant was measured by the Glycogen Assay  
499 Kit (BioVision Inc., San Francisco, CA) according to the manufacturer's instruction.  
500 The exposure of DAB, H89, Rp-8-Br-cAMPS, Sq22.536 or GF109203X was started 30  
501 min before PACAP exposure. The amount of glycogen was normalized by the amount  
502 of the protein contained in the samples, which was measured by the Bradford's assay kit  
503 (Bio-Rad, Hercules, CA) according to the manufacturer's instruction.

504

#### 505 **Lactate assay**

506 Culture medium was replaced to Krebs-Ringer buffer (NaCl 135 mM, KCl 5 mM,  
507 CaCl<sub>2</sub> 1 mM, MgSO<sub>4</sub> 1 mM, KH<sub>2</sub>PO<sub>4</sub> 0.4 mM, D-glucose 5.5 mM, HEPES 20 mM),  
508 and the astrocytes were habituated in this buffer for 2 hrs. The cultured spinal astrocytes  
509 were then exposed to PACAP, PMA or forskolin for 60 min, and conditioned buffer was  
510 harvested (0 ~ 60 min). Subsequently, fresh Krebs-Ringer buffer with drugs was added  
511 on the cultured astrocytes again, and harvested the conditioned buffer for another 60  
512 min (60 ~ 120 min). The time course was determined according to the previous paper  
513 which suggested DAB inhibited lactate secretion in 60 ~ 180 min after the treatment,  
514 but not in 0 ~ 60 min (*Tarczyluk et al., 2013*). Lactate amount in the conditioned

515 Krebs-Ringer buffer was measured by the L-lactate Assay Kit (BioVision Inc.)  
516 according to the manufacturer's instruction. The exposure of DAB or GF109203X was  
517 started 30 min before PACAP treatment.

518

### 519 **Statistical analysis**

520 Experimental data are expressed as mean  $\pm$  SEM. For mechanical threshold analyses,  
521 we employed the Mann-Whitney U-test for single comparisons or the Friedman test  
522 followed by the Steel test for multiple comparisons. For other analyses, single  
523 comparisons were made using the Student two-tailed unpaired *t*-test, and for multiple  
524 comparisons, one-way analysis of variance followed by the Dunnett or Tukey test was  
525 used.  $P < 0.05$  was considered statistically significant.

526

### 527 **Acknowledgements**

528 The authors thank all the staff members of the Institute of Laboratory Animal Science  
529 Reserch Support Center, Kagoshima University.

530

### 531 **Additional information**

532

533 **Funding**

| 534 | <b>Funder</b>         | <b>Grant reference number</b> | <b>Author</b>    |
|-----|-----------------------|-------------------------------|------------------|
| 535 | JSPS Kakenhi          | 17K08310                      | Yuki Kambe       |
| 536 | Yamada Research Grant |                               | Yuki Kambe       |
| 537 | JSPS Kakenhi          | 16K15339                      | Takashi Kurihara |
| 538 | JSPS Kakenhi          | 17K08599                      | Atsuro Miyata    |

539

540 **Author contributions**

541 YK carried out experiments, performed statistical analysis, and drafted the manuscript.

542 MY carried out experiments and performed statistical analysis. TK conceived,

543 participated in the design of the study, performed behavioral studies, and wrote the

544 manuscript. AM and IT participated in the design of the study and reviewed the

545 manuscript. All authors read and approved the final manuscript.

546

547 **Author ORCID**

548 Yuki Kambe <https://orcid.org/0000-0003-1484-0628>

549 Takashi Kurihara <https://orcid.org/0000-0003-4001-6771>

550

551 **References**

- 552 **Baron A**, Monnier D, Roatti A, Baertschi AJ. 2001. Pituitary adenylate cyclase-  
553 activating polypeptide activates  $K_{ATP}$  current in rat atrial myocytes. *American*  
554 *Journal of Physiology Heart and Circulatory Physiology* **280**: H1058-1065. DOI:  
555 <https://doi.org/10.1152/ajpheart.2001.280.3.H1058>, PMID: 11179047
- 556 **Boury-Jamot B**, Carrard A, Martin JL, Halfon O, Magistretti PJ, Boutrel B. 2015.  
557 Disrupting astrocyte-neuron lactate transfer persistently reduces conditioned  
558 responses to cocaine. *Molecular Psychiatry* **21**: 1070-1076. DOI: [https://doi.org/10.](https://doi.org/10.1038/mp.2015.157)  
559 [1038/mp.2015.157](https://doi.org/10.1038/mp.2015.157), PMID: 26503760
- 560 **Brunet JF**, Allaman I, Magistretti PJ, Pellerin L. 2010. Glycogen metabolism as a  
561 marker of astrocyte differentiation. *Journal of Cerebral Blood Flow and Metabolism*  
562 **30**: 51-55. DOI: <https://doi.org/10.1038/jcbfm.2009.207>, PMID: 19809466
- 563 **Cataldo AM**, Broadwell RD. 1986. Cytochemical identification of cerebral glycogen  
564 and glucose-6-phosphatase activity under normal and experimental conditions. II.  
565 Choroid plexus and ependymal epithelia, endothelia and pericytes. *Journal of*  
566 *Neurocytology* **15**: 511-524. DOI: <https://doi.org/10.1007/BF01611733>, PMID:  
567 [3018177](https://doi.org/10.1007/BF01611733)



- 568 **Chaplan SR**, Bach FW, Pogrel JW, Chung JM, Yaksh TL. 1994. Quantitative  
569 assessment of tactile allodynia in the rat paw. *Journal of Neuroscience Methods* **53**:  
570 55-63. DOI: [https://doi.org/10.1016/0165-0270\(94\)90144-9](https://doi.org/10.1016/0165-0270(94)90144-9), PMID: 7990513
- 571 **Deutsch PJ**, Sun Y. 1992. The 38-amino acid form of pituitary adenylate cyclase-  
572 activating polypeptide stimulates dual signaling cascades in PC12 cells and promotes  
573 neurite outgrowth. *Journal of Biological Chemistry* **267**: 5108-5113. PMID: 1312085
- 574 **Dickinson T**, Mitchell R, Robberecht P, Fleetwood-Walker SM. 1999. The role of  
575 VIP/PACAP receptor subtypes in spinal somatosensory processing in rats with an  
576 experimental peripheral mononeuropathy. *Neuropharmacology* **38**: 167-180. DOI:  
577 [https://doi.org/10.1016/S0028-3908\(98\)00171-3](https://doi.org/10.1016/S0028-3908(98)00171-3), PMID: 10193908
- 578 **Dringen R**, Gebhardt R, Hamprecht B. 1993. Glycogen in astrocytes: possible function  
579 as lactate supply for neighboring cells. *Brain Research* **623**: 208-214. DOI: [https://](https://doi.org/10.1016/0006-8993(93)91429-V)  
580 [doi.org/10.1016/0006-8993\(93\)91429-V](https://doi.org/10.1016/0006-8993(93)91429-V), PMID: 8221102
- 581 **Dugan LL**, Kim JS, Zhang Y, Bart RD, Sun Y, Holtzman DM, Gutmann DH. 1999.  
582 Differential effects of cAMP in neurons and astrocytes. Role of B-raf. *Journal of*  
583 *Biological Chemistry* **274**: 25842-25848. DOI: [https://doi.org/10.1074/](https://doi.org/10.1074/jbc.274.36.25842)  
584 [jbc.274.36.25842](https://doi.org/10.1074/jbc.274.36.25842), PMID: 10464325

- 585 **Dun EC**, Huang RL, Dun SL, Dun NJ. 1996. Pituitary adenylate cyclase activating  
586 polypeptide-immunoreactivity in human spinal cord and dorsal root ganglia. *Brain*  
587 *Research* **721**: 233-237. DOI: [https://doi.org/10.1016/0006-8993\(96\)00139-4](https://doi.org/10.1016/0006-8993(96)00139-4), PMID:  
588 [8793105](https://pubmed.ncbi.nlm.nih.gov/8793105/)
- 589 **Dun NJ**, Miyazaki T, Tang H, Dun EC. 1996. Pituitary adenylate cyclase activating  
590 polypeptide immunoreactivity in the rat spinal cord and medulla: implication of  
591 sensory and autonomic functions. *Neuroscience* **73**: 677-686. DOI: [https://doi.org/](https://doi.org/10.1016/0306-4522(96)00057-7)  
592 [10.1016/0306-4522\(96\)00057-7](https://doi.org/10.1016/0306-4522(96)00057-7), PMID: [8809789](https://pubmed.ncbi.nlm.nih.gov/8809789/)
- 593 **Duran J**, Saez I, Gruart A, Guinovart JJ, Delgado-Garcia JM. 2013. Impairment in  
594 long-term memory formation and learning-dependent synaptic plasticity in mice  
595 lacking glycogen synthase in the brain. *Journal of Cerebral Blood Flow and*  
596 *Metabolism* **33**: 550-556. DOI: <https://doi.org/10.1038/jcbfm.2012.200>, PMID:  
597 [23281428](https://pubmed.ncbi.nlm.nih.gov/23281428/)
- 598 **Gibbs ME**. 2016. Role of Glycogenolysis in Memory and Learning: Regulation by  
599 Noradrenaline, Serotonin and ATP. *Frontiers in Integrative Neuroscience* **9**: 70.  
600 DOI: <https://doi.org/10.3389/fnint.2015.00070>, PMID: [26834586](https://pubmed.ncbi.nlm.nih.gov/26834586/)
- 601 **Gosselin RD**, Meylan P, Decosterd I. 2013. Extracellular microvesicles from astrocytes  
602 contain functional glutamate transporters: regulation by protein kinase C and cell

- 603 activation. *Frontiers in Cellular Neuroscience* **7**: 251. DOI: <https://doi.org/10.3389/>
- 604 [fncel.2013.00251](https://doi.org/10.3389/fncel.2013.00251), PMID: 24368897
- 605 **Grace PM, Hutchinson MR, Maier SF, Watkins LR.** 2014. Pathological pain and the
- 606 neuroimmune interface. *Nature Reviews Immunology* **14**: 217-231. DOI: [https://](https://doi.org/10.1038/nri3621)
- 607 [doi.org/10.1038/nri3621](https://doi.org/10.1038/nri3621), PMID: 24577438
- 608 **He Y, Wang ZJ.** 2015. Nociceptor beta II, delta, and epsilon isoforms of PKC
- 609 differentially mediate paclitaxel-induced spontaneous and evoked pain. *Journal of*
- 610 *Neuroscience* **35**: 4614-4625. DOI: [https://doi.org/10.1523/](https://doi.org/10.1523/JNEUROSCI.1580-14.2015)
- 611 [JNEUROSCI.1580-14.2015](https://doi.org/10.1523/JNEUROSCI.1580-14.2015), PMID: 25788678
- 612 **Ji RR, Xu ZZ, Gao YJ.** 2014. Emerging targets in neuroinflammation-driven chronic
- 613 pain. *Nature Reviews Drug Discovery* **13**: 533-548. DOI: [https://doi.org/10.1038/](https://doi.org/10.1038/nrd4334)
- 614 [nrd4334](https://doi.org/10.1038/nrd4334), PMID: 24948120
- 615 **Jongsma H, Danielsen N, Sundler F, Kanje M.** 2000. Alteration of PACAP distribution
- 616 and PACAP receptor binding in the rat sensory nervous system following sciatic
- 617 nerve transection. *Brain Research* **853**: 186-196. DOI: [https://doi.org/10.1016/](https://doi.org/10.1016/S0006-8993(99)02233-7)
- 618 [S0006-8993\(99\)02233-7](https://doi.org/10.1016/S0006-8993(99)02233-7), PMID: 10640616
- 619 **Jongsma Wallin H, Pettersson LM, Verge VM, Danielsen N.** 2003. Effect of anti-nerve
- 620 growth factor treatment on pituitary adenylate cyclase activating polypeptide

- 621 expression in adult sensory neurons exposed to adjuvant induced inflammation.
- 622 *Neuroscience* **120**: 325-331. DOI: [https://doi.org/10.1016/S0306-4522\(03\)00118-0](https://doi.org/10.1016/S0306-4522(03)00118-0),
- 623 PMID: [12890505](https://pubmed.ncbi.nlm.nih.gov/12890505/)
- 624 **Kuner R, Flor H.** 2016. Structural plasticity and reorganisation in chronic pain. *Nature*
- 625 *Reviews Neuroscience* **18**: 20-30. DOI: <https://doi.org/10.1038/nrn.2016.162>, PMID:
- 626 [27974843](https://pubmed.ncbi.nlm.nih.gov/27974843/)
- 627 **Mabuchi T, Shintani N, Matsumura S, Okuda-Ashitaka E, Hashimoto H, Muratani T,**
- 628 **Minami T, Baba A, Ito S.** 2004. Pituitary adenylate cyclase-activating polypeptide is
- 629 required for the development of spinal sensitization and induction of neuropathic pain.
- 630 *Journal of Neuroscience* **24**: 7283-7291. DOI: [https://doi.org/10.1523/](https://doi.org/10.1523/JNEUROSCI.0983-04.2004)
- 631 [JNEUROSCI.0983-04.2004](https://doi.org/10.1523/JNEUROSCI.0983-04.2004), PMID: [15317855](https://pubmed.ncbi.nlm.nih.gov/15317855/)
- 632 **Magistretti PJ, Allaman I.** 2015. A cellular perspective on brain energy metabolism
- 633 and functional imaging. *Neuron* **86**: 883-901. DOI: [https://doi.org/10.1016/](https://doi.org/10.1016/j.neuron.2015.03.035)
- 634 [j.neuron.2015.03.035](https://doi.org/10.1016/j.neuron.2015.03.035), PMID: [25996133](https://pubmed.ncbi.nlm.nih.gov/25996133/)
- 635 **Magistretti PJ, Cardinaux JR, Martin JL.** 1998. VIP and PACAP in the CNS:
- 636 regulators of glial energy metabolism and modulators of glutamatergic signaling.
- 637 *Annals of the New York Academy of Sciences* **865**: 213-225. DOI: [https://doi.org/](https://doi.org/10.1111/j.1749-6632.1998.tb11181.x)
- 638 [10.1111/j.1749-6632.1998.tb11181.x](https://doi.org/10.1111/j.1749-6632.1998.tb11181.x), PMID: [9928015](https://pubmed.ncbi.nlm.nih.gov/9928015/)

- 639 **Miyata A**, Arimura A, Dahl RR, Minamino N, Uehara A, Jiang L, Culler MD, Coy DH.  
640 1989. Isolation of a novel 38 residue-hypothalamic polypeptide which stimulates  
641 adenylate cyclase in pituitary cells. *Biochemical and Biophysical Research*  
642 *Communications* **164**: 567-574. DOI: [https://doi.org/10.1016/0006-291X\(89\)91757-9](https://doi.org/10.1016/0006-291X(89)91757-9),  
643 PMID: [2803320](https://pubmed.ncbi.nlm.nih.gov/2803320/)
- 644 **Miyata A**, Jiang L, Dahl RD, Kitada C, Kubo K, Fujino M, Minamino N, Arimura A.  
645 1990. Isolation of a neuropeptide corresponding to the N-terminal 27 residues of the  
646 pituitary adenylate cyclase activating polypeptide with 38 residues (PACAP38).  
647 *Biochemical and Biophysical Research Communications* **170**: 643-648. DOI:  
648 [https://doi.org/10.1016/0006-291X\(90\)92140-U](https://doi.org/10.1016/0006-291X(90)92140-U), PMID: [2383262](https://pubmed.ncbi.nlm.nih.gov/2383262/)
- 649 **Moller K**, Zhang YZ, Hakanson R, Luts A, Sjolund B, Uddman R, Sundler F. 1993.  
650 Pituitary adenylate cyclase activating peptide is a sensory neuropeptide:  
651 immunocytochemical and immunochemical evidence. *Neuroscience* **57**: 725-732.  
652 DOI: [https://doi.org/10.1016/0306-4522\(93\)90018-B](https://doi.org/10.1016/0306-4522(93)90018-B), PMID: [7508577](https://pubmed.ncbi.nlm.nih.gov/7508577/)
- 653 **Moro O**, Lerner EA. 1997. Maxadilan, the vasodilator from sand flies, is a specific  
654 pituitary adenylate cyclase activating peptide type I receptor agonist. *Journal of*  
655 *Biological Chemistry* **272**: 966-970. DOI: <https://doi.org/10.1074/jbc.272.2.966>,  
656 PMID: [8995389](https://pubmed.ncbi.nlm.nih.gov/8995389/)

- 657 **Nagase M**, Takahashi Y, Watabe AM, Kubo Y, Kato F. 2014. On-site energy supply at  
658 synapses through monocarboxylate transporters maintains excitatory synaptic  
659 transmission. *Journal of Neuroscience* **34**: 2605-2617. DOI: [https://doi.org/10.1523/  
660 JNEUROSCI.4687-12.2014](https://doi.org/10.1523/JNEUROSCI.4687-12.2014), PMID: 24523550
- 661 **Narita M**, Dun SL, Dun NJ, Tseng LF. 1996. Hyperalgesia induced by pituitary  
662 adenylate cyclase-activating polypeptide in the mouse spinal cord. *European Journal  
663 of Pharmacology* **311**: 121-126. DOI: [https://doi.org/10.1016/0014-2999\(96\)00359-7](https://doi.org/10.1016/0014-2999(96)00359-7),  
664 PMID: 8891591
- 665 **Narumi K**, Furugen A, Kobayashi M, Otake S, Itagaki S, Iseki K. 2010. Regulation of  
666 monocarboxylate transporter 1 in skeletal muscle cells by intracellular signaling  
667 pathways. *Biological and Pharmaceutical Bulletin* **33**: 1568-1573. DOI:  
668 <https://doi.org/10.1248/bpb.33.1568>, PMID: 20823576
- 669 **Narumi K**, Kobayashi M, Otake S, Furugen A, Takahashi N, Ogura J, Itagaki S, Hirano  
670 T, Yamaguchi H, Iseki K. 2012. Regulation of human monocarboxylate transporter 4  
671 in skeletal muscle cells: the role of protein kinase C (PKC). *International Journal of  
672 Pharmaceutics* **428**: 25-32. DOI: <https://doi.org/10.1016/j.ijpharm.2012.02.021>,  
673 PMID: 22426323

- 674 **Newman LA**, Korol DL, Gold PE. 2011. Lactate produced by glycogenolysis in  
675 astrocytes regulates memory processing. *PLoS One* **6**: e28427. DOI: [https://doi.org/](https://doi.org/10.1371/journal.pone.0028427)  
676 [10.1371/journal.pone.0028427](https://doi.org/10.1371/journal.pone.0028427), PMID: 22180782
- 677 **Ohnou T**, Yokai M, Kurihara T, Hasegawa-Moriyama M, Shimizu T, Inoue K, Kambe  
678 Y, Kanmura Y, Miyata A. 2016. Pituitary adenylate cyclase-activating polypeptide  
679 type 1 receptor signaling evokes long-lasting nociceptive behaviors through the  
680 activation of spinal astrocytes in mice. *Journal of Pharmacological Sciences* **130**:  
681 194-203. DOI: <https://doi.org/10.1016/j.jphs.2016.01.008>, PMID: 26948958
- 682 **Ovens MJ**, Davies AJ, Wilson MC, Murray CM, Halestrap AP. 2010. AR-C155858 is a  
683 potent inhibitor of monocarboxylate transporters MCT1 and MCT2 that binds to an  
684 intracellular site involving transmembrane helices 7-10. *Biochemical Journal* **425**:  
685 523-530. DOI: <https://doi.org/10.1042/BJ20091515>, PMID: 19929853
- 686 **Pierre K**, Pellerin L. 2005. Monocarboxylate transporters in the central nervous system:  
687 distribution, regulation and function. *Journal of Neurochemistry* **94**: 1-14. DOI:  
688 <https://doi.org/10.1111/j.1471-4159.2005.03168.x>, PMID: 15953344
- 689 **Sakashita Y**, Kurihara T, Uchida D, Tatsuno I, Yamamoto T. 2001. Involvement of  
690 PACAP receptor in primary afferent fibre-evoked responses of ventral roots in the

- 691 neonatal rat spinal cord. *British Journal of Pharmacology* **132**: 1769-1776. DOI:  
692 <https://doi.org/10.1038/sj.bjp.0703980>, PMID: 11309249
- 693 **Sandkuhler J.** 2007. Understanding LTP in pain pathways. *Molecular Pain* **3**: 9. DOI:  
694 <https://doi.org/10.1186/1744-8069-3-9>, PMID: 17407590
- 695 **Shimizu T, Katahira M, Sugawara H, Inoue K, Miyata A.** 2004. Diverse effects of  
696 intrathecal pituitary adenylate cyclase-activating polypeptide on nociceptive  
697 transmission in mice spinal cord. *Regulatory Peptides* **123**: 117-122. DOI:  
698 <https://doi.org/10.1016/j.regpep.2004.05.019>, PMID: 15518901
- 699 **Smith JP, Uhernik AL, Li L, Liu Z, Drewes LR.** 2012. Regulation of Mct1 by  
700 cAMP-dependent internalization in rat brain endothelial cells. *Brain Research* **1480**:  
701 1-11. DOI: <https://doi.org/10.1016/j.brainres.2012.08.026>, PMID: 22925948
- 702 **Sorg O, Magistretti PJ.** 1991. Characterization of the glycogenolysis elicited by  
703 vasoactive intestinal peptide, noradrenaline and adenosine in primary cultures of  
704 mouse cerebral cortical astrocytes. *Brain Research* **563**: 227-233. DOI:  
705 [https://doi.org/10.1016/0006-8993\(91\)91538-C](https://doi.org/10.1016/0006-8993(91)91538-C), PMID: 1664773
- 706 **Suzuki A, Stern SA, Bozdagi O, Huntley GW, Walker RH, Magistretti PJ, Alberini CM.**  
707 2011. Astrocyte-neuron lactate transport is required for long-term memory formation.  
708 *Cell* **144**: 810-823. DOI: <https://doi.org/10.1016/j.cell.2011.02.018>, PMID: 21376239



- 709 **Tarczyluk MA**, Nagel DA, O'Neil JD, Parri HR, Tse EH, Coleman MD, Hill EJ. 2013.  
710 Functional astrocyte-neuron lactate shuttle in a human stem cell-derived neuronal  
711 network. *Journal of Cerebral Blood Flow and Metabolism* **33**: 1386-1393. DOI:  
712 <https://doi.org/10.1038/jcbfm.2013.81>, PMID: 23715062
- 713 **Vaudry D**, Falluel-Morel A, Bourgault S, Basille M, Burel D, Wurtz O, Fournier A,  
714 Chow BK, Hashimoto H, Galas L, Vaudry H. 2009. Pituitary adenylate cyclase-  
715 activating polypeptide and its receptors: 20 years after the discovery.  
716 *Pharmacological Reviews* **61**: 283-357. DOI: <https://doi.org/10.1124/pr.109.001370>,  
717 PMID: 19805477
- 718 **Velázquez KT**, Mohammad H, Sweitzer SM. 2007. Protein kinase C in pain:  
719 involvement of multiple isoforms. *Pharmacological Research* **55**: 578-589. DOI:  
720 <https://doi.org/10.1016/j.phrs.2007.04.006>, PMID: 17548207
- 721 **Yang J**, Ruchti E, Petit JM, Jourdain P, Grenningloh G, Allaman I, Magistretti PJ. 2014.  
722 Lactate promotes plasticity gene expression by potentiating NMDA signaling in  
723 neurons. *Proceedings of the National Academy of Sciences of the United States of*  
724 *America* **111**: 12228-12233. DOI: <https://doi.org/10.1073/pnas.1322912111>, PMID:  
725 25071212

- 726 **Yokai M**, Kurihara T, Miyata A. 2016. Spinal astrocytic activation contributes to both  
727 induction and maintenance of pituitary adenylate cyclase-activating polypeptide type  
728 1 receptor-induced long-lasting mechanical allodynia in mice. *Molecular Pain* **12**:  
729 1-13. DOI: <https://doi.org/10.1177/1744806916646383>, PMID: 27175011
- 730 **Zhang Q**, Shi TJ, Ji RR, Zhang YZ, Sundler F, Hannibal J, Fahrenkrug J, Hokfelt T.  
731 1995. Expression of pituitary adenylate cyclase-activating polypeptide in dorsal root  
732 ganglia following axotomy: time course and coexistence. *Brain Research* **705**:  
733 149-158. DOI: [https://doi.org/10.1016/0006-8993\(95\)01150-1](https://doi.org/10.1016/0006-8993(95)01150-1), PMID: 8821745
- 734 **Zhang Y**, Danielsen N, Sundler F, Mulder H. 1998. Pituitary adenylate cyclase-  
735 activating peptide is upregulated in sensory neurons by inflammation. *Neuroreport* **9**:  
736 2833-2836. DOI: <https://doi.org/10.1097/00001756-199808240-00027>, PMID:  
737 9760129
- 738 **Zhang Y**, Xue Y, Meng S, Luo Y, Liang J, Li J, Ai S, Sun C, Shen H, Zhu W, Wu P,  
739 Lu L, Shi J. 2016. Inhibition of lactate transport erases drug memory and prevents  
740 drug relapse. *Biological Psychiatry* **79**: 928-939. DOI: [https://doi.org/10.1016/](https://doi.org/10.1016/j.biopsych.2015.07.007)  
741 [j.biopsych.2015.07.007](https://doi.org/10.1016/j.biopsych.2015.07.007), PMID: 26293178
- 742

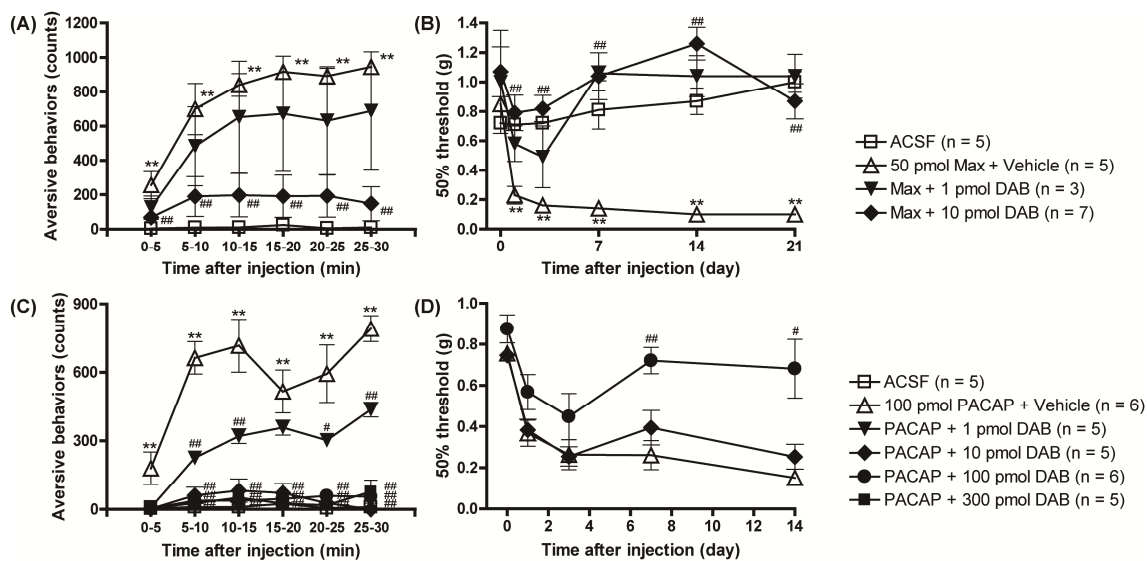

743

744

745 **Figure 1.** A critical role of glycogenolysis in PACAP/PAC1 receptor-evoked

746 nociceptive behaviors.

747 Simultaneous i.t. injection of DAB (1 or 10 pmol), a glycogenolysis inhibitor, with Max

748 (50 pmol), blocked the induction of aversive behaviors (A) and mechanical allodynia

749 (B). Simultaneous i.t. injection of DAB (1 ~ 300 pmol) with PACAP (100 pmol)

750 prevented the induction of aversive behaviors (C) and mechanical allodynia (D).

751 \*P<0.05 and \*\*P<0.01 when compared with ACSF data. #P<0.05 and ##P<0.01 when

752 compared with Max + Vehicle in (A) and (B) or PACAP + Vehicle in (C) and (D).

753 Statistical significance was evaluated by the Tukey test for (A) and (C), and Steel test

754 for (B) and (D).

755

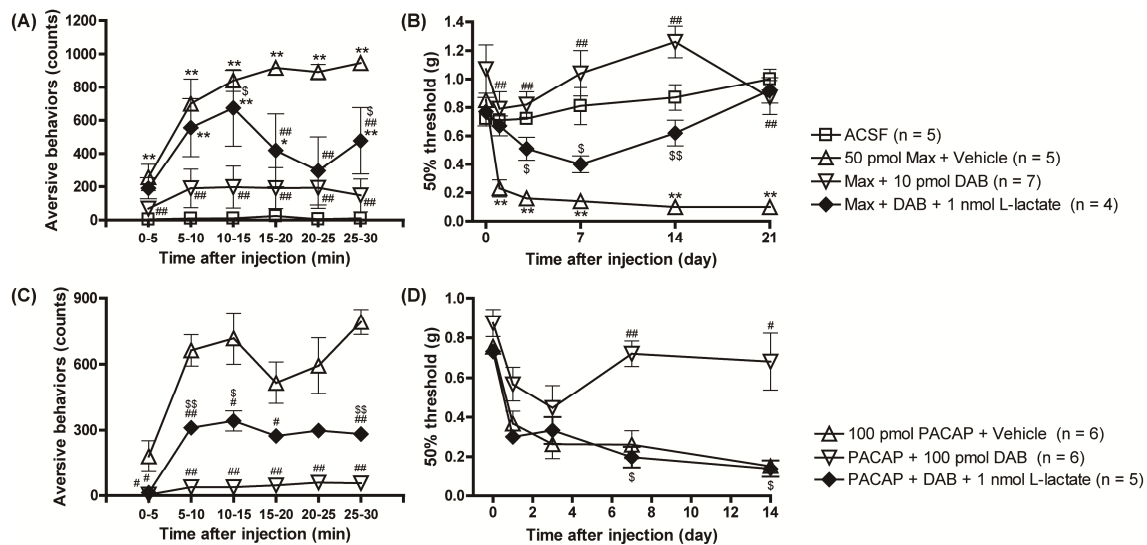

756

757

758 **Figure 2.** Simultaneous injection of L-lactate reversed the inhibitory effects of DAB on

759 the PAC1 receptor-induced nociceptive behaviors.

760 I.t. co-administration of L-lactate (1 nmol) with DAB (10 or 100 pmol) reinstated Max

761 (A, B)- and PACAP (C, D)-induced aversive behaviors (A, C) and mechanical allodynia

762 (B, D). \*P<0.05 and \*\*P<0.01 when compared with ACSF data. #P<0.05 and ##P<0.01

763 when compared with Max + Vehicle in (A) and (B) or PACAP + Vehicle in (C) and (D).

764 \$P<0.05 and \$\$P<0.01 when compared with DAB-treated data. Statistical significance

765 was evaluated by the Tukey test for (A) and (C), and Steel test for (B) and (D).

766

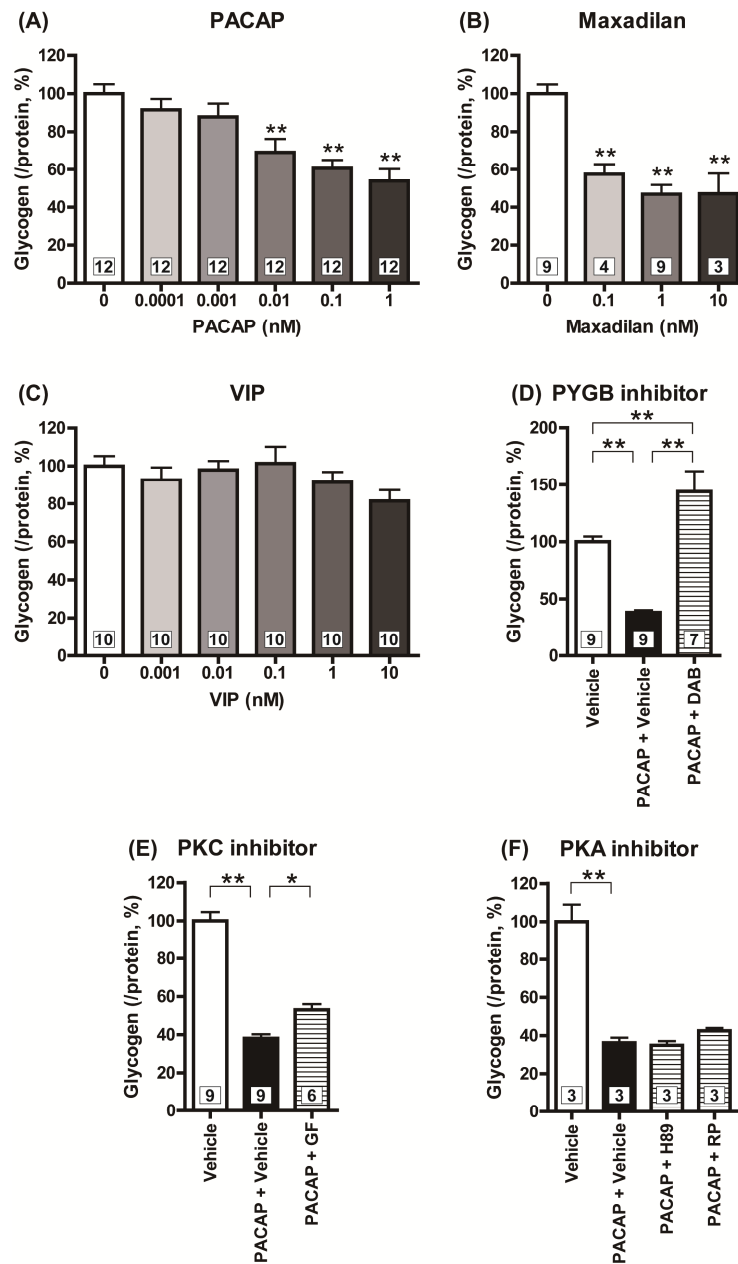

767

768

769 **Figure 3.** PACAP/PAC1 receptor/PKC signaling pathway induced glycolysis in

770 cultured spinal cord astrocytes.

771 Cultured astrocytes were exposed to PACAP (0.0001 ~ 1 nM) (A), Max (0.1 ~ 10 nM)

772 (B) or VIP (0.001 ~ 10 nM) (C), and glycogen amounts contained in the astrocytes were

773 measured 60 min after the exposure. Cultured astrocytes were pre-incubated with DAB  
774 (1 mM, **D**), GF109203X (GF, 5  $\mu$ M, **E**), H89 (10  $\mu$ M, **F**), or Rp-8Br-cAMPS (RP, 100  
775  $\mu$ M, **F**) for 30 min prior to PACAP (1 nM) exposure, and glycogen amounts contained  
776 in the astrocytes were measured 60 min after the PACAP exposure. \*P<0.05 and  
777 \*\*P<0.01 when compared with 0 nM (Vehicle) data in (A) ~ (C), and compared groups  
778 are indicated above in (D) ~ (F). Statistical significance was evaluated by the Dunnett  
779 test for (A) ~ (C), and Tukey test for (D) ~ (F). Exact sample sizes are indicated in the  
780 graphs.

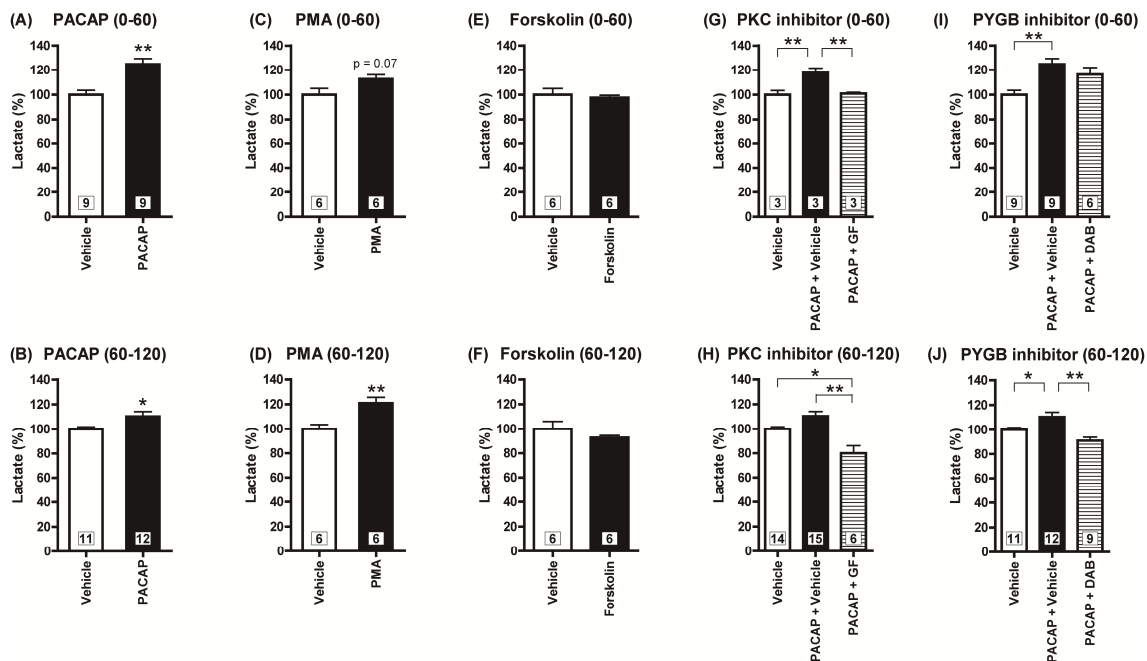

781

782

783 **Figure 4.** A crucial role of PACAP/PAC1 receptor/PKC-induced glycogenolysis in the  
 784 lactate secretion from cultured spinal astrocytes.

785 After the treatment with PACAP (1 nM) (A, B), PMA (100 nM) (C, D) or forskolin (5  
 786  $\mu$ M) (E, F), the supernatants from the cultured spinal astrocytes were differentially

787 harvested during 0 ~ 60 min (A, C, E) or 60 ~ 120 min (B, D, F), and lactate amounts

788 were measured. Cultured astrocytes were pre-incubated with GF109203X (GF, 5  $\mu$ M, G,

789 H) or DAB (1 mM, I, J) for 30 min prior to PACAP exposure, and then exposed to

790 PACAP (1 nM) for 120 min. Culture supernatants were differentially harvested during 0

791 ~ 60 min (G, I) or 60 ~ 120 min (H, J) after the PACAP addition, and lactate amounts

792 were measured. \*P<0.05 and \*\*P<0.01 when compared with vehicle data in (A) ~ (F),

793 and compared groups are indicated above in (G) ~ (J). Statistical significance was  
794 evaluated by the Student t-test for (A) ~ (F), and Tukey test for (G) ~ (J). Exact sample  
795 sizes are indicated in the graphs.  
796



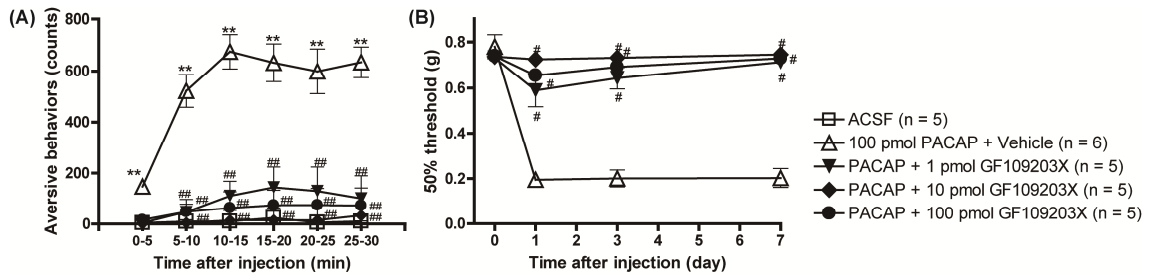

797

798

799 **Figure 5.** The importance of PKC in the PACAP/PAC1 receptor-induced nociceptive  
800 behaviors.

801 Simultaneous i.t. injection of GF109203X (1 ~ 100 pmol) with PACAP (100 pmol)

802 dose-dependently reduced the PACAP-induced aversive behaviors (A) and mechanical

803 allodynia (B). \*P<0.05 and \*\*P<0.01 when compared with ACSF data. #P<0.05 and

804 ##P<0.01 when compared with PACAP + Vehicle data. Statistical significance was

805 evaluated by the Tukey test for (A), and Steel test for (B).

806

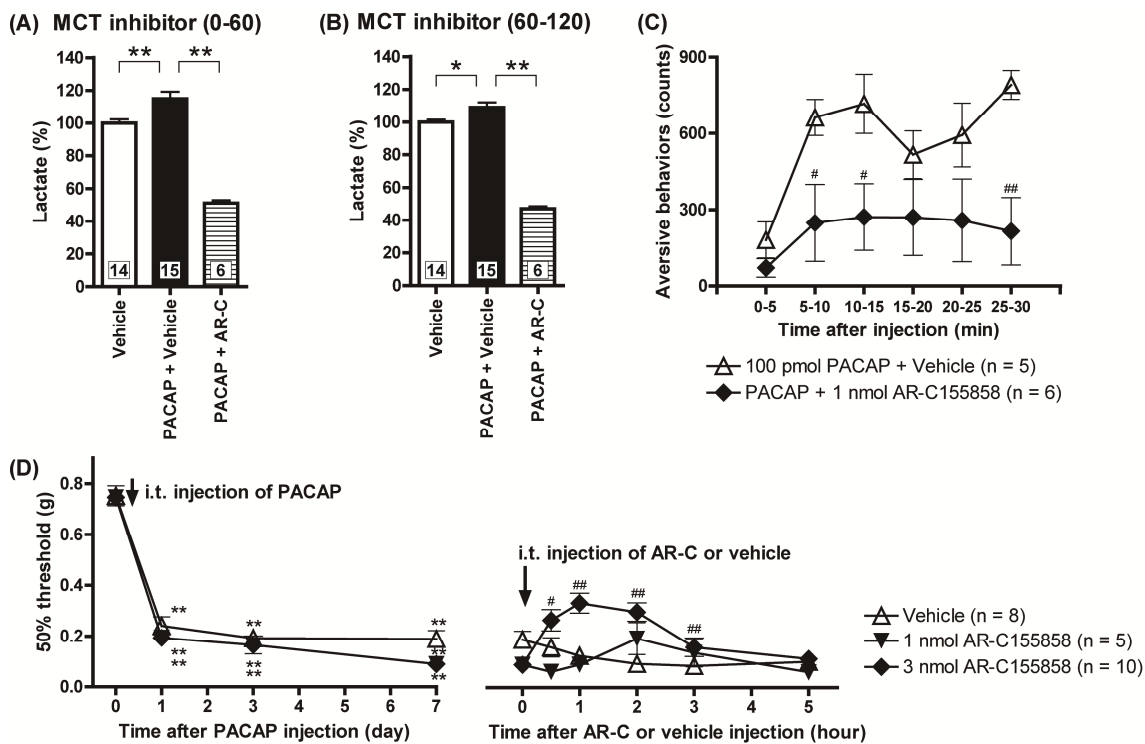

807

808

809 **Figure 6.** Spinal MCTs play a crucial role in both induction and maintenance of the

810 PACAP/PAC1 receptor-induced nociceptive behaviors.

811 Cultured spinal astrocytes were pre-incubated with AR-C155858 (AR-C, 1  $\mu$ M) 30 min

812 prior to PACAP exposure, and then exposed to PACAP (1 nM) for 120 min. The culture

813 supernatants were differentially harvested during 0 ~ 60 min (A) or 60 ~ 120 min (B)

814 after the PACAP addition, and lactate amounts in the culture supernatants were

815 measured. \* $P < 0.05$  and \*\* $P < 0.01$  (compared groups are indicated above). Exact sample

816 sizes are indicated in the graphs. (C) I.t. co-administration of AR-C155858 (1 nmol)

817 with PACAP reduced the expression of the aversive behaviors. \* $P < 0.05$  and \*\* $P < 0.01$

818 when compared with PACAP + Vehicle data. (D) Transient reversal of the  
819 PACAP-evoked mechanical allodynia by intrathecal AR-C155858. AR-C155858 was  
820 injected 7 days after intrathecal PACAP. \*\*P<0.01 when compared with pre-PACAP  
821 data. #P<0.05 and ##P<0.01 when compared with vehicle-treated control. Statistical  
822 significance was evaluated by the Tukey test for (A) and (B), Student t-test for (C), and  
823 Steel test for (D).

824

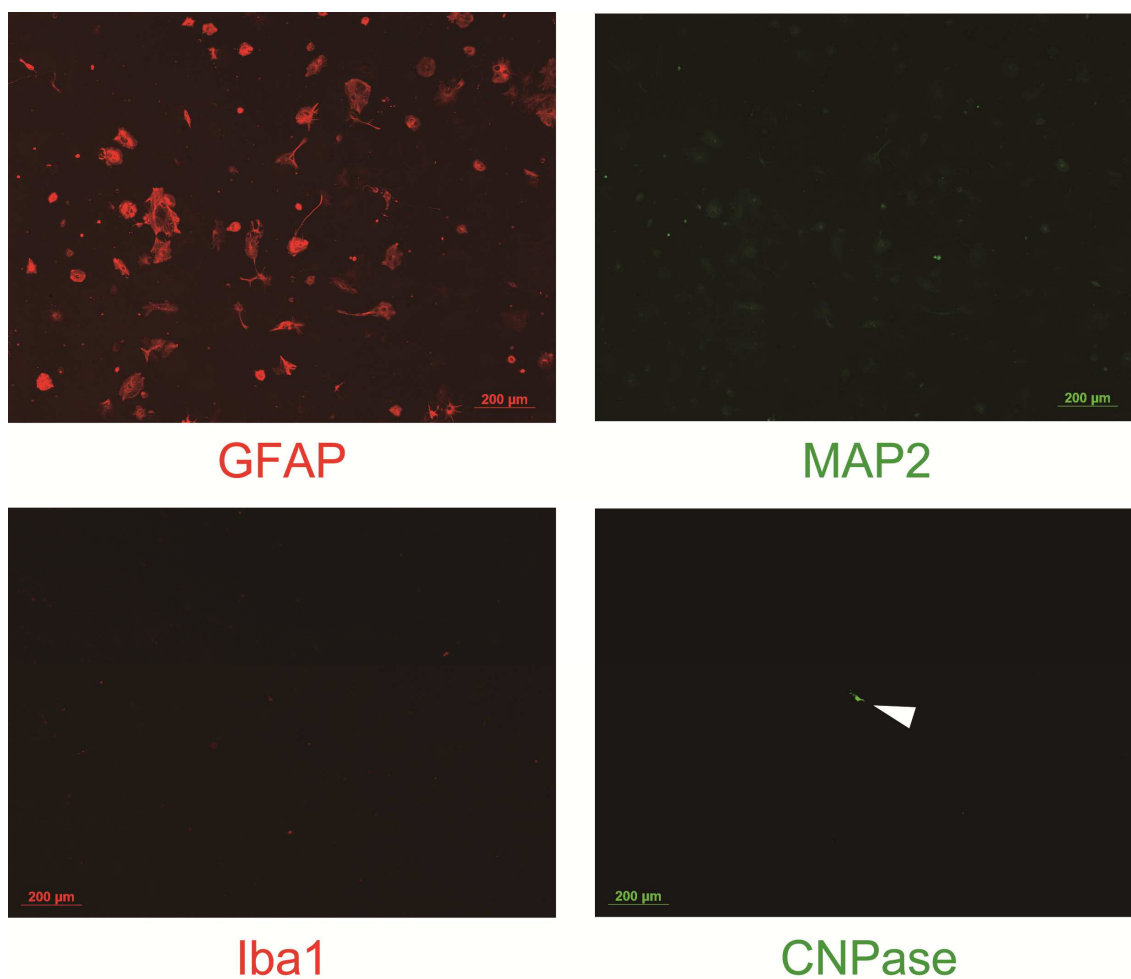

825

826

827 **Figure 3 - figure supplement 1.** Representative immunofluorescent images of the  
828 cultured spinal astrocytes. The purity of astrocytes was examined by staining with  
829 primary antibodies against GFAP (an astrocyte marker), MAP2 (a neuron marker), Iba 1  
830 (a microglia marker) and MBP (an oligodendrocyte marker). Each marker was  
831 visualized by an appropriate fluorescent dye-conjugated secondary antibody. Arrowhead  
832 represented an incidentally contaminated oligodendrocyte. Bar = 200 µm.

833

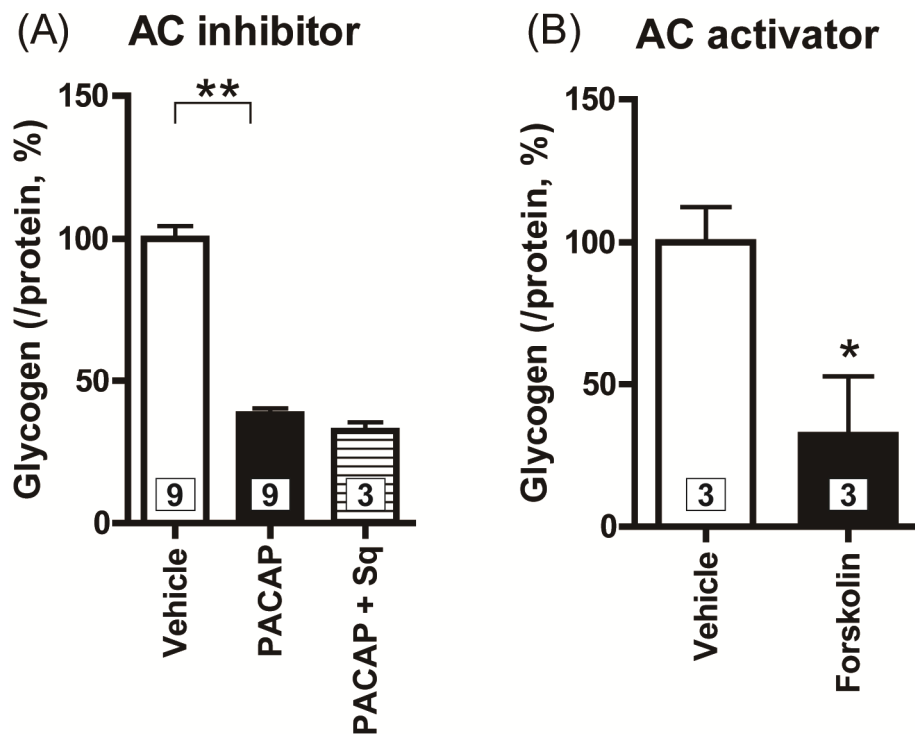

834

835

836 **Figure 3 – figure supplement 2.** PAC1 receptor might not be coupled with the G<sub>s</sub>

837 protein/PKA pathway in the cultured spinal astrocytes.

838 Cultured spinal astrocytes were pre-incubated with Sq22.536 (Sq, 100  $\mu$ M) for 30 min

839 prior to PACAP (1 nM) exposure, and glycogen amounts contained in the astrocytes

840 were measured 60 min after the PACAP exposure (A). Cultured spinal astrocytes were

841 exposed to forskolin (5  $\mu$ M), and glycogen amounts contained in the astrocytes were

842 measured 60 min after the exposure (B). \*P<0.05 and \*\*P<0.01 when compared with

843 Vehicle. Statistical significance was evaluated by the Dunnett test for (A) and Student

844 t-test for (B). Exact sample sizes are indicated in the graphs.
